# Supplementary material for: Phase 3 Trials of Thermosensitive Ciprofloxacin Gel for Middle Ear Effusion in Children with Tubes
Source: PubMed Central journal article supplement — Otolaryngol Head Neck Surg. 2016 May 17;155(2):324–31. doi: 10.1177/0194599816645526 (PMC4971606; doi:10.1177/0194599816645526), 2016-05-17
Supplement: OTO645526_fig_s1.pdf [file OTO645526_fig_s1.pdf]

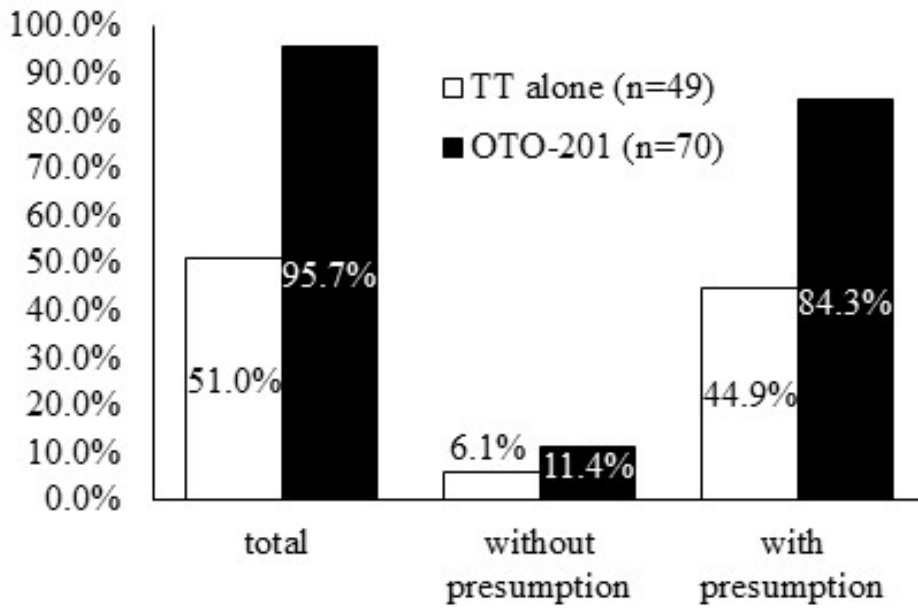

**Figure S1.** Microbiologic Response by Treatment Group through Day 15 (Microbiologically Evaluable Population, Secondary Efficacy Endpoint)
