# Supplementary material for: Phase 3 Trials of Thermosensitive Ciprofloxacin Gel for Middle Ear Effusion in Children with Tubes
Source: PubMed Central journal article supplement — Otolaryngol Head Neck Surg. 2016 May 17;155(2):324–31. doi: 10.1177/0194599816645526 (PMC4971606; doi:10.1177/0194599816645526), 2016-05-17
Supplement: OTO645526_fig_s2.pdf [file OTO645526_fig_s2.pdf]

**A**

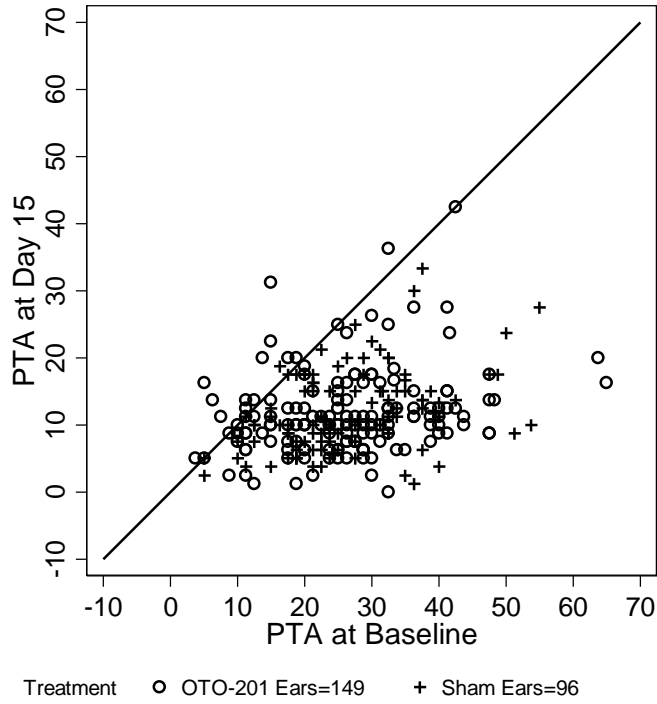

**B**

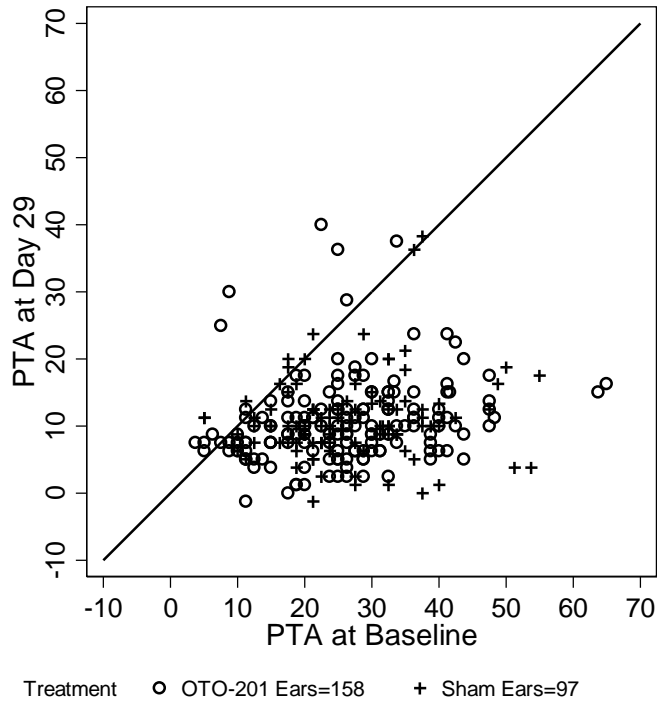

**Figure S2.** Scatterplot of Pure Tone Average (PTA) from Air Conduction Thresholds for All Ears (Safety Analysis Population). Figures S2A, Day 15; Figure S2B, Day 29.
