# Supplementary material for: Phase 3 Trials of Thermosensitive Ciprofloxacin Gel for Middle Ear Effusion in Children with Tubes
Source: PubMed Central journal article supplement — Otolaryngol Head Neck Surg. 2016 May 17;155(2):324–31. doi: 10.1177/0194599816645526 (PMC4971606; doi:10.1177/0194599816645526), 2016-05-17
Supplement: OTO645526_fig_s3.pdf [file OTO645526_fig_s3.pdf]

**A**

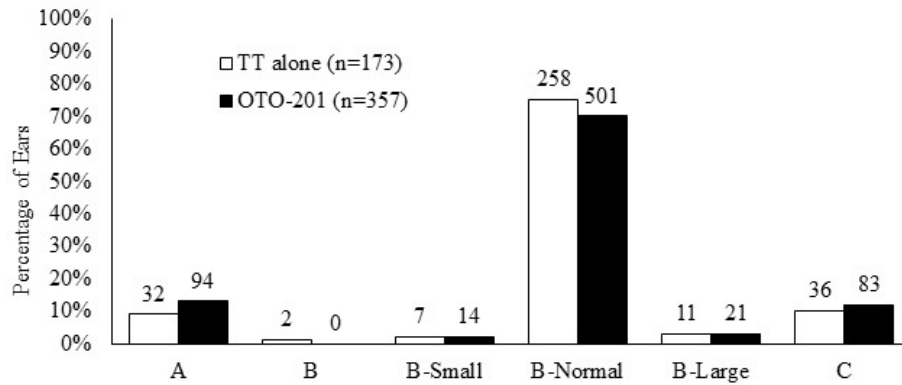

**B**

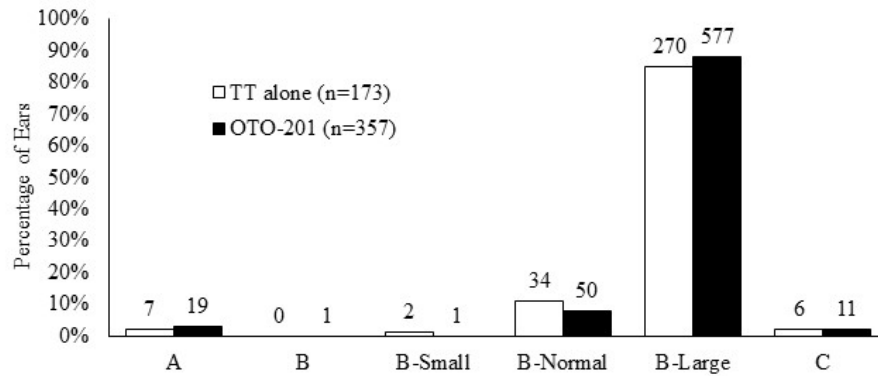

**C**

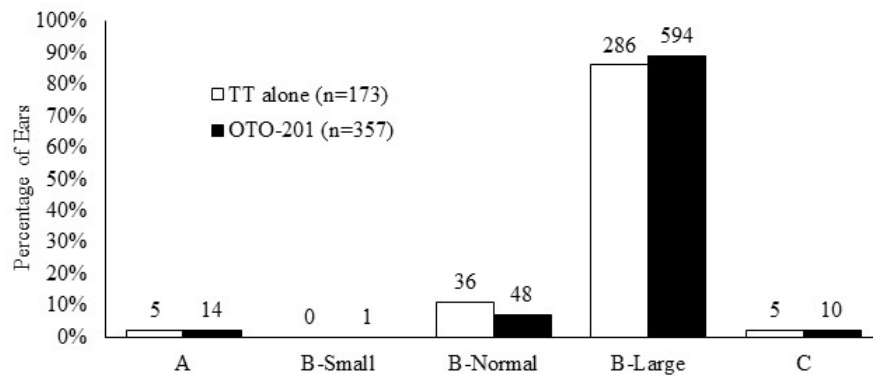

**Figure S3.** Tympanometry Category at Baseline, Day 15 and Day 29 Using Ear as the Unit of Analysis (Safety Analysis Population). Figure S3a, Baseline (OTO-201 ears=713, TT alone ears=346); Figure S3B, Day 15 (OTO-201 ears=659, TT alone ears=319); Figure S3C, Day 29 (OTOA-201 ears=667, TT alone ears=332).
