# Supplementary material for: Phase 3 Trials of Thermosensitive Ciprofloxacin Gel for Middle Ear Effusion in Children with Tubes
Source: PubMed Central journal article supplement — Otolaryngol Head Neck Surg. 2016 May 17;155(2):324–31. doi: 10.1177/0194599816645526 (PMC4971606; doi:10.1177/0194599816645526), 2016-05-17
Supplement: OTO645526_table_s1.pdf [file OTO645526_table_s1.pdf]

**Table S1.** Summary of Tube Patency by Treatment Group and Visit (Safety Analysis Population)

|        |          |              | <b>OTO-201</b><br><b>(N=357)</b><br><b>n (%)</b> | <b>TT Alone</b><br><b>(N=173)</b><br><b>n (%)</b> |
|--------|----------|--------------|--------------------------------------------------|---------------------------------------------------|
| Day 4  | Blocked  | Zero Tubes   | 331 (93.5)                                       | 166 (96.5)                                        |
|        |          | One Tube     | 20 (5.6)                                         | 5 (2.9)                                           |
|        |          | Two Tubes    | 3 (0.8)                                          | 1 (0.6)                                           |
|        |          | At Least One | 23 (6.5)                                         | 6 (3.5)                                           |
|        | Extruded | Zero Tubes   | 354 (100)                                        | 172 (100)                                         |
|        |          | One Tube     | 0                                                | 0                                                 |
|        |          | Two Tubes    | 0                                                | 0                                                 |
|        |          | At Least One | 0                                                | 0                                                 |
| Day 8  | Blocked  | Zero Tubes   | 336 (94.9)                                       | 161 (94.2)                                        |
|        |          | One Tube     | 15 (4.2)                                         | 9 (5.3)                                           |
|        |          | Two Tubes    | 3 (0.8)                                          | 1 (0.6)                                           |
|        |          | At Least One | 18 (5.1)                                         | 10 (5.8)                                          |
|        | Extruded | Zero Tubes   | 352 (99.4)                                       | 171 (100)                                         |
|        |          | One Tube     | 2 (0.6)                                          | 0                                                 |
|        |          | Two Tubes    | 0                                                | 0                                                 |
|        |          | At Least One | 2 (0.6)                                          | 0                                                 |
| Day 15 | Blocked  | Zero Tubes   | 335 (94.4)                                       | 159 (93.0)                                        |
|        |          | One Tube     | 18 (5.1)                                         | 10 (5.8)                                          |
|        |          | Two Tubes    | 2 (0.6)                                          | 2 (1.2)                                           |
|        |          | At Least One | 20 (5.6)                                         | 12 (7.0)                                          |
|        | Extruded | Zero Tubes   | 353 (99.4)                                       | 170 (99.4)                                        |
|        |          | One Tube     | 1 (0.3)                                          | 1 (0.6)                                           |
|        |          | Two Tubes    | 1 (0.3)                                          | 0                                                 |

|        |          |              | <b>OTO-201</b><br><b>(N=357)</b><br><b>n (%)</b> | <b>TT Alone</b><br><b>(N=173)</b><br><b>n (%)</b> |
|--------|----------|--------------|--------------------------------------------------|---------------------------------------------------|
|        |          | At Least One | 2 (0.6)                                          | 1 (0.6)                                           |
| Day 29 | Blocked  | Zero Tubes   | 336 (94.9)                                       | 164 (95.9)                                        |
|        |          | One Tube     | 16 (4.5)                                         | 6 (3.5)                                           |
|        |          | Two Tubes    | 2 (0.6)                                          | 1 (0.6)                                           |
|        |          | At Least One | 18 (5.1)                                         | 7 (4.1)                                           |
|        | Extruded | Zero Tubes   | 351 (99.2)                                       | 170 (99.4)                                        |
|        |          | One Tube     | 2 (0.6)                                          | 1 (0.6)                                           |
|        |          | Two Tubes    | 1 (0.3)                                          | 0                                                 |
|        |          | At Least One | 3 (0.8)                                          | 1 (0.6)                                           |
